# Supplementary material for: Synthesis, mesomorphic behaviour and optical anisotropy of some novel materials for nematic mixtures of high birefringenceElectronic supplementary information (ESI) available: experimental procedures for all compounds not already given in this paper. See http://www.rsc.org/suppdata/jm/b4/b400630e/
Source: Royal Society of Chemistry journal article supplement (doi:10.1039/b400630e), 2004-01-01
Supplement: b400630e.doc [file b400630e.doc]

Synthesis, Mesomorphic Behaviour and Optical Anisotropy of some Novel Materials for Nematic Mixtures of High Birefringence

Michael Hird,a Kenneth J. Toyne,a John W. Goodby,a George W. Gray,a Victoria Minter,b Rachel P. Tuffinb and Damien G. McDonnellc

a The Department of Chemistry, University of Hull, Hull, UK, HU6 7RX

b QinetiQ Limited, St Andrews Road, Malvern, WR14 3PS

c Defence Diversification Agency, Ively Road, Farnborough, GU14 0LX

**Experimental proceedures for RSC Supplementary Information Service**

**Experimental**

Confirmation of the structures of intermediates and products was obtained by 1H and 13C NMR spectroscopy (JEOL JNM-GX270 spectrometer), infrared spectroscopy (Perkin-Elmer 457 grating spectrophotometer) and mass spectrometry (Finnigan-MAT 1020 GC/MS spectrometer). Elemental analysis (Fisons EA1108 CHN) data were obtained for each final compound prepared (**8**, **9**, **13**, **17**, **20**, **37**, **38**, **44**, **47**-**50**, **52**-**54**, **57**, **59**, **61**, **65**-**67**, **70**, **71**).

The progress of reactions was frequently monitored using a Chrompack 9001 capillary gas chromatograph fitted with a CP-SIL 5 CB 10 m x 0.25 mm, 0.12 m column (Cat. No. 7700).

Transition temperatures were measured using a Mettler FP5 hot-stage and control unit in conjunction with an Olympus BH2 polarising microscope and these were confirmed using differential scanning calorimetry (Perkin-Elmer DSC-7 and IBM data station). Where final compounds did not exhibit a nematic phase, virtual TN-I values were determined from four binary mixtures (5-30% m/m) in E7 (a nematic host mixture with a TN-I value of 60 °C). The TN-I values obtained for the mixtures were extrapolated to 100% of the compound being examined using a linear regression computer program to give the line of best fit, and are accurate to ±5 °C, assuming ideal mixing behaviour.

The purities of intermediates were checked by GLC analysis (see above) and the purity of each final compound (**8**, **9**, **13**, **17**, **20**, **37**, **38**, **44**, **47**-**50**, **52**-**54**, **57**, **59**, **61**, **65**-**67**, **70**, **71**) was checked by HPLC analysis (Merck-Hitachi with Merck RP 18 column, Cat. No. 16 051) and were found to be >99.5% pure in each case.

Compounds **1**,1 **2**,1 **10**,1 **14**,2 **18**,1 **30**,3 **45**,1 **46**4 and **51**3 were prepared according to a previous publications. Tetrakis(triphenylphosphine)palladium(0) was prepared according to the literature procedure.5 Compounds **3**, **11**, **21**, **23**, **39**, **55**, **58**, **62**-**64**, **68** and **69** are all commercially-available. The nematic host mixtures (E7 and I-eutectic) were kindly supplied by our collaborators at Merck Chemicals Limited.

Note that extra care was taken in the handling of the aryl amines because of their suspected carcinogenic nature.

2-Butoxy-6-(4-nitrophenyl)naphthalene (**4**)

A solution of compound **1** (3.22 g, 0.013 mol) in DME (30 ml) was added dropwise to a stirred, refluxing mixture of compound **3** (2.20 g, 0.011 mol), tetrakis(triphenylphosphine)palladium(0) (0.40 g, 0.35 mmol), sodium carbonate (5 g) in DME (20 ml) and water (50 ml) under nitrogen. The mixture was heated under reflux for 16 h (GLC and TLC analyses revealed a complete reaction) and poured into water. The product was extracted into ether (x2) and the combined ethereal extracts were washed with brine, and dried (MgSO4). The solvent was removed *in vacuo* and the crude product was purified by column chromatography (silica gel / hexane - dichloromethane, 2:1) to give a pale yellow solid which was recrystallised from ethanol to give colourless crystals.

Yield 3.13 g (89%); transitions (°C) C 106.0 N 119.5 I; 1H NMR (CDCl3)  1.00(3H, t), 1.55(2H, sext), 1.85(2H, quint), 4.10(2H, t), 7.16(1H, d), 7.21(1H, dd), 7.70(1H, dd), 7.81(1H, d), 7.83(1H, d), 7.84(2H, d), 8.01(1H, d), 8.32(2H, d); IR (KBr) max 2960, 2940, 2860, 1630, 1595, 1520, 1395, 1345, 1205, 850, 755 cm–1; MS *m/z* 321(M+), 265, 219, 289.

2-(4-Nitrophenyl)-6-pent-1-ynylnaphthalene (**5**)

Quantities: compound **3** (1.50 g, 7.43 mmol), compound **2** (2.10 g, 8.80 mmol). The experimental procedure was as described for the preparation of compound **4**. The crude product was purified by column chromatography (silica gel / hexane - dichloromethane, 2:1) to give a pale yellow solid which was recrystallised from ethanol to yield colourless crystals.

Yield 1.39 g (59%); transitions (°C) C 99.5 N 116.0 I; 1H NMR (CDCl3)  1.10(3H, t), 1.70(2H, sext), 2.45(2H, t), 7.53(1H, dd), 7.73(1H, dd), 7.83(1H, d), 7.86(2H, d), 7.90(1H, d), 7.95(1H, d), 8.05(1H, d), 8.35(2H, d); IR (KBr) max 2960, 2940, 2860, 1515, 1340, 1110, 855, 820, 750 cm–1; MS *m/z* 315(M+), 300, 286, 239.

2-(4-Aminophenyl)-6-butoxynaphthalene (**6**)

A stirred mixture of compound **4** (2.82 g, 8.79 mmol) and 5% palladium on carbon (1.50 g) in THF (135 ml) and ethanol (10 ml) was hydrogenated for 24 h (GLC and TLC analyses revealed a complete reaction), and the mixture was filtered and poured into water. The product was extracted into ether (x2) and the combined ethereal extracts were washed with water and dried (MgSO4). The solvent was removed *in vacuo* to yield an off-white solid which was used without further purification.

Yield 2.21 g (86%); mp 141-142 °C; 1H NMR (CDCl3)  1.00(3H, t), 1.55(2H, sext), 1.85(2H, quint), 3.70(2H, s), 4.05(2H, t), 6.79(2H, d), 7.14(2H, d), 7.52(2H, d), 7.65(1H, d), 7.75(2H, d), 7.88(1H, d); IR (KBr) max 3560, 3390, 2960, 2940, 2860, 1620, 1605, 1520, 1505, 1390, 1275, 1250, 1205, 1175, 1125, 890, 860, 840, 820 cm–1; MS *m/z* 291(M+), 235.

2-(4-Aminophenyl)-6-pentylnaphthalene (**7**)

Quantities: compound **5** (1.17 g, 3.71 mmol), 5% palladium on carbon (1.50 g). The experimental procedure was as described for the preparation of compound **6**.

Yield 0.73 g (68%); mp 107-109 °C; 1H NMR (CDCl3)  0.90(3H, t), 1.35(4H, m), 1.70(2H, quint), 2.75(2H, t), 4.30(2H, s), 6.80(2H, d), 7.32(1H, dd), 7.52(2H, d), 7.59(1H, d), 7.66(1H, dd), 7.76(1H, d), 7.79(1H, d), 7.91(1H, d); IR (KBr) max 3400, 2960, 2860, 1620, 1520, 1420, 1265, 890, 820 cm–1; MS *m/z* , 289(M+), 232.

2-Butoxy-6-(4-isothiocyanatophenyl)naphthalene (**8**)

A solution of compound **6** (2.05 g, 7.04 mmol) in chloroform (50 ml) was added to a stirred, cooled (0 °C) mixture of water (10 ml), calcium carbonate (1.10 g, 0.011 mol), chloroform (5 ml) and thiophosgene (1.00 g, 8.70 mmol). The stirred mixture was heated at 35 °C for 1.5 h and then poured into water. The aqueous layer was washed with dichloromethane and the combined organic extracts were washed with 1% aqueous hydrochloric acid and dried (MgSO4). The solvent was removed *in vacuo* and the residue was purified by column chromatography (silica gel / dichloromethane) to give a colourless solid which was recrystallised from ethanol-ethyl acetate (1:1) to yield colourless crystals.

Yield 2.05 g (87%); transitions (°C) C 123.5 B 125.0 N 177.0 I; 1H NMR (CDCl3) 1.00(3H, t), 1.55(2H, sext), 1.85(2H, quint), 4.10(2H, t), 7.14(1H, d), 7.18(1H, dd), 7.32(2H, d), 7.63(1H, dd), 7.68(2H, d), 7.77(1H, d), 7.79(1H, d), 7.93(1H, d); IR (KBr) max 2960, 2940, 2860, 2050, 1625, 1605, 1605, 1500, 1395, 1280, 1255, 1210, 1175, 860, 840, 805 cm–1; MS *m/z* 333(M+), 277. Calc. for C21H19NOS: C, 75.64; H, 5.74; N, 4.20. Found: C, 75.57; H, 5.70; N, 4.20.

2-(4-Isothiocyanatophenyl)-6-pentylnaphthalene (**9**)

Quantities: compound **7** (0.66 g, 2.28 mmol), thiophosgene (0.35 g, 3.04 mmol), calcium carbonate (0.38 g, 3.80 mmol). The experimental procedure was as described for the preparation of compound **8**. The crude product was purified by column chromatography (silica gel / dichloromethane) to give a colourless solid which was recrystallised from ethanol to yield colourless crystals.

Yield 0.36 g (48%); transitions (°C) C 55.0 E 93.0 SA 104.0 N 140.5 I; 1H NMR (CDCl3)  0.90(3H, t), 1.35(4H, m), 1.70(2H, quint), 2.80(2H, t), 7.32(2H, d), 7.37(1H, dd), 7.62(1H, d), 7.65(1H, dd), 7.69(2H, d), 7.81(1H, d), 7.85(1H, d), 7.97(1H, d); IR (KBr) max 2960, 2940, 2860, 2100, 1500, 890, 840, 820 cm–1; MS *m/z* 331(M+), 274. Calc. for C22H21NS: C, 79.72; H, 6.39; N, 4.23. Found: C, 79.70; H, 6.36; N, 4.21.

1-(4-Aminophenyl)-2-(6-butoxynaphth-2-yl)ethyne (**12**)

A solution of n-butyllithium (4.40 ml, 2.5M in hexane, 0.011 mol) was added dropwise to a stirred, cooled (–10 °C) solution of compound **10** (2.47 g, 0.011 mol) in dry THF (60 ml) under dry nitrogen. The mixture was stirred at –10 °C for 15 min. and a solution of zinc chloride (1.50 g, 0.011 mol) in dry THF (30 ml) was added, and the mixture was stirred at 15 °C for 30 min. A solution of compound **11** (2.19 g, 0.010 mol) in THF (20 ml) was added followed by tetrakis(triphenylphosphine)palladium(0) (0.50 g, 0.43 mmol), and the mixture was stirred at 30 °C for 14 h (GLC and TLC analyses revealed a complete reaction). The mixture was poured into 10% hydrochloric acid and the product was extracted into ether (x2). The combined ethereal extracts were washed with aqueous sodium hydrogen carbonate and dried (MgSO4). The solvent was removed *in vacuo* and the crude product was purified by column chromatography (silica gel / dichloromethane) to give a pale yellow solid.

Yield 2.04 g (65%); transitions (°C) C 121.5 (N 111.5) I; 1H NMR (CDCl3) 1.00(3H, t), 1.50(2H, sext), 1.85(2H, quint), 3.80(2H, s), 4.10(2H, t), 6.65(2H, d), 7.08(1H, d), 7.14(1H, d), 7.37(2H, d), 7.50(1H, dd), 7.65(1H, d), 7.69(1H, d), 7.91(1H, d); IR (KBr) max 3480, 3390, 2960, 2940, 2880, 2210, 1625, 1600, 1520, 1475, 1390, 1300, 1260, 1220, 1180, 1015, 900, 865, 845 cm–1; MS *m/z* 315(M+), 259.

1-(6-Butoxynaphth-2-yl)-2-(4-isothiocyanatophenyl)ethyne (**13**)

Quantities: compound **12** (1.89 g, 6.00 mmol), thiophosgene (0.89 g, 7.74 mmol), calcium carbonate (0.95 g, 9.50 mmol). The experimental procedure was as described for the preparation of compound **8**. The crude product was purified by column chromatography (silica gel / dichloromethane) to give an off-white solid which was recrystallised from ethanol to yield colourless crystals.

Yield 1.68 g (78%); transitions (°C) C 123.0 (SA 117.0) N 190.5 I; 1H NMR (CDCl3)  1.00(3H, t), 1.50(2H, sext), 1.80(2H, quint), 4.10(2H, t), 7.10(1H, d), 7.16(1H, dd), 7.20(2H, d), 7.51(1H, dd), 7.53(2H, d), 7.67(1H, d), 7.71(1H, d), 7.96(1H, d); IR (KBr) max 2960, 2940, 2860, 2120, 2060, 1620, 1600, 1590, 1510, 1390, 1260, 1215, 1175, 1135, 980, 940, 860, 840, 820 cm–1; MS *m/z* 357(M+), 301. Calc. for C23H19NOS: C, 77.28; H, 5.36; N, 3.92. Found: C, 77.22; H, 5.36; N, 3.87.

4-Nitro-4''-pentylterphenyl (**15**)

Quantities: compound **3** (2.95 g, 0.015 mol), compound **14** (4.50 g, 0.017 mol). The experimental procedure was as described for the preparation of compound **4**. The crude product was purified by column chromatography (silica gel / hexane - dichloromethane, 2:1) to give a yellow solid which was recrystallised from ethanol to yield pale yellow crystals.

Yield 4.20 g (81%); transitions (°C) C 142.0 B 143.5 N 204.0 I; 1H NMR (CDCl3) 0.90(3H, t), 1.35(4H, m), 1.65(2H, quint), 2.65(2H, t), 7.30(2H, d), 7.57(2H, d), 7.70(4H, 2xd), 7.78(2H, d), 8.31(2H, d); IR (KBr) max 2960, 2940, 2860, 1605, 1595, 1525, 1485, 1345, 915, 855, 810, 755 cm–1; MS *m/z* 345(M+), 288.

4-Amino-4''-pentylterphenyl (**16**)

Quantities: compound **15** (3.80 g, 0.011 mol), 5% palladium on carbon (2.40 g). The experimental procedure was as described for the preparation of compound **6**.

Yield 2.96 g (85%); C 182.0 N 201.0 I; 1H NMR (CDCl3)  0.90(3H, t), 1.35(4H, m), 1.65(2H, quint), 2.65(2H, t), 3.75(2H, s), 6.77(2H, d), 7.26(2H, d), 7.46(2H, d), 7.55(2H, d), 7.61(4H, 2xd); IR (KBr) max 3550, 3390, 3320, 2940, 2860, 1610, 1495, 1405, 1260, 1005, 805 cm–1; MS *m/z* 315(M+), 258.

4-Isothiocyanato-4''-pentylterphenyl (**17**)

Quantities: compound **16** (2.72 g, 8.63 mmol), thiophosgene (1.23 g, 0.011 mol), calcium carbonate (1.35 g, 0.014 mol). The experimental procedure was as described for the preparation of compound **8**. The crude product was purified by column chromatography (silica gel / dichloromethane) to give a colourless solid which was recrystallised from ethanol-ethyl acetate (1:2) to yield colourless crystals.

Yield 2.52 g (82%); transitions (°C) C 94.0 E 248.0 SA 257.5 N 262.0 I; 1H NMR (CDCl3)  0.90(3H, t), 1.35(4H, m), 1.65(2H, quint), 2.65(2H, t), 7.27(2H, d), 7.31(2H, d), 7.55(2H, d), 7.61(4H, 2xd), 7.68(2H, d); IR (KBr) max 2960, 2940, 2860, 2020, 1490, 1400, 1005, 940, 810 cm–1; MS *m/z* 357(M+), 300. Calc. for C24H23NS: C, 80.63; H, 6.48; N, 3.92. Found: C, 80.59; H, 6.48; N, 3.90.

1-(4-Aminophenyl)-2-(4-pentylphenyl)ethyne (**19**)

Quantities: compound **18** (2.18 g, 0.0127 mol), n-butyllithium (5.10 ml, 2.5M in hexanes, 0.0127 mol), zinc chloride (1.74 g, 0.0128 mol), compound **11** (2.5 g, 0.011 mol), tetrakis(triphenylphosphine)palladium(0) (0.38 g, 0.33 mmol). The experimental procedure was as described for the preparation of compound **12**. The crude product was purified by column chromatography (silica gel / hexane - dichloromethane, 3:1) to give an off-white solid.

Yield 2.51 g (87%); mp 71-73 °C; 1H NMR (CDCl3)  0.90(3H, t), 1.35(4H, m), 1.60(2H, quint), 2.60(2H, t), 3.85(2H, s), 6.63(2H, d), 7.13(2H, d), 7.33(2H, d), 7.40(2H, d); IR (KBr) max 3490, 3390, 2960, 2940, 2860, 2220, 1620, 1600, 1525, 1300, 835, 540 cm–1; MS *m/z* 263(M+), 206.

1-(4-Isothiocyanatophenyl)-2-(4-pentylphenyl)ethyne (**20**)

Quantities: compound **19** (2.38 g, 9.05 mmol), thiophosgene (1.31 g, 0.011 mol), calcium carbonate (1.45 g, 0.015 mol). The experimental procedure was as described for the preparation of compound **8**. The crude product was purified by column chromatography (silica gel / dichloromethane) to give an off-white solid which was recrystallised from ethanol to yield colourless crystals.

Yield 2.23 g (81%); transitions (°C) C 91.5 (B 85.5) [N 65] I; 1H NMR (CDCl3)  0.95(3H, t), 1.35(4H, m), 1.65(2H, quint), 2.65(2H, t), 7.18(2H, d), 7.22(2H, d), 7.45(2H, d), 7.51(2H, d); IR (KBr) max 2960, 2940, 2860, 2180, 2110, 1510, 1030, 840 cm–1; MS *m/z* 305(M+), 247. Calc. for C20H19NS: C, 78.65; H, 6.27; N, 4.59. Found: C, 78.60; H, 6.25; N, 4.55.

4-Bromo-2,5-difluoroaniline (**22**)

*N*-bromosuccinimide (28.50 g, 0.160 mol) was added in portions to a stirred, cooled (–5 °C) solution of compound **21** (20.00 g, 0.155 mol) in dry dichloromethane (250 ml). The mixture was stirred at room temperature for 10 minutes (GLC analysis revealed a complete reaction) and poured into water. The organic layer was separated and the aqueous layer was washed with dichloromethane, and the combined organic layers were dried (MgSO4). The solvent was removed *in vacuo* to give a purple solid which was recrystallised from hexane to yield pale purple crystals.

Yield 28.97 g (90%); mp 76-77 °C; 1H NMR (CDCl3)  3.80(2H, s), 6.55(1H, dd), 7.15(1H, dd); IR (KBr) max 3440, 3350, 1640, 1505, 1425, 1235, 1195, 1175, 1010, 875, 845, 805, 740 cm–1; MS *m/z* 209(M+), 207(M+), 128.

1-Bromo-2,5-difluoro-4-iodobenzene (**24**)

A solution of sodium nitrite (7.22 g, 0.105 mol in water (30 ml) was added dropwise to a stirred, cooled (–5 °C) mixture of compound **22** (19.00 g, 0.091 mol) 36% hydrochloric acid (110 ml) and water (30 ml). The mixture was stirred for 15 minutes at 0 °C, cyclohexane (100 ml) was added, and a solution of potassium iodide (30.25 g, 0.182 mol) in water (50 ml) was added dropwise. The mixture was stirred at room temperature overnight, water was added and the product was extracted into ether (x2). The combined ethereal extracts were washed with water, 10% sodium hydroxide, water, and dried (MgSO4). The solvent was removed *in vacuo* to give a red solid, which was distilled to yield a pale pink solid.

Yield 23.74 g (82%); bp 118-120 °C at 15 mmHg; mp 60-61 °C; 1H NMR (CDCl3) 7.27(1H, dd), 7.50(1H, dd); IR (KBr) max 1485, 1465, 1365, 1180, 1060, 880, 785 cm–1; MS *m/z* 320(M+), 318(M+), 193, 191.

2-Bromo-5-iodotoluene (**25**)

Quantities: compound **23** (32.00 g, 0.172 mol), sodium nitrite (13.06 g, 0.19 mol), potassium iodide (57.11 g, 0.344 mol). The experimental procedure was as described for the preparation of compound **24**. The crude product was distilled to yield a colourless oil.

Yield 31.40 g (61%); bp 132-134 °C at 15 mmHg; 1H NMR (CDCl3)  2.30(3H, s), 7.21(1H, d), 7.32(1H, dd), 7.54(1H, d); IR (film) max 2980, 2960, 2940, 1575, 1460, 1380, 1200, 1080, 1060, 1030, 875, 840, 805 cm–1; MS *m/z* 298(M+), 296(M+), 171, 169.

1-Bromo-2-5-difluoro-4-pent-1-ynylbenzene (**26**)

A solution of n-butyllithium (7.20 ml, 10.0M in hexanes, 0.072 mol) was added dropwise to a stirred, cooled (–10 °C) solution of pent-1-yne (4.90 g, 0.072 mol) in dry THF (100 ml). The mixture was stirred for 10 minutes and a solution of zinc chloride (9.80 g, 0.072 mol) in dry THF (80 ml) was added dropwise. The mixture was stirred at room temperature for 15 minutes, a solution of compound **24** (20.00 g, 0.063 mol) in dry THF (80 ml) was added followed by tetrakis(triphenylphosphine)palladium(0) (1.10 g, 0.95 mmol). The mixture was stirred at 30 °C for 16 h (GLC analysis revealed a complete reaction) and poured into aqueous ammonium chloride. The product was extracted into ether (x2), and the combined ethereal extracts were washed with water and dried (MgSO4). The solvent was removed *in vacuo*, and the crude product was passed through a short column of basic alumina and distilled to yield a colourless liquid.

Yield 13.58 g (83%); bp 135-140 °C at 15 mmHg; 1H NMR (CDCl3)  1.05(3H, t), 1.65(2H, sext), 2.45(2H, t), 7.13(1H, dd), 7.26(1H, dd); IR (film) max 2960, 2940, 2860, 2220, 1490, 1400, 1275, 1200, 1180, 880, 790, 770 cm–1; MS *m/z* 260(M+), 258(M+), 231, 229.

2-Bromo-5-pent-1-ynyltoluene (**27**)

Quantities: pent-1-yne (2.58 g, 0.038 mol), n-butyllithium (3.80 ml, 10.0M in hexanes, 0.038 mol), zinc chloride (5.10 g, 0.038 mol), compound **25** (10.00 g, 0.034 mol). The experimental procedure was as described for the preparation of compound **26**.

Yield 8.00 g (99%); bp 150-154 °C at 15 mmHg; 1H NMR (CDCl3)  1.00(3H, t), 1.60(2H, sext), 2.35(5H, m), 7.05(1H, dd), 7.25(1H, d), 7.42(1H, d); IR (film) max 2960, 2940, 2880, 2240, 1470, 1385, 1340, 1030, 885, 820 cm–1; MS *m/z* 238(M+), 236(M+), 209, 207.

1-Bromo-2,5-difluoro-4-pentylbenzene (**28**)

A stirred mixture of compound **26** (12.60 g, 0.049 mol) and platinum(IV) oxide (0.20 g) in ethanol (150 ml) was hydrogenated at room temperature and atmospheric pressure for 4 h (GLC analysis revealed a complete reaction). The catalyst was filtered off and the crude product was distilled to yield a colourless liquid.

Yield 12.60 g (98%); bp 120-122 °C at 15 mmHg; 1H NMR (CDCl3)  0.90(3H, t), 1.30(4H, m), 1.55(2H, quint), 2.55(2H, t), 6.94(1H, dd), 7.19(1H, dd); IR (film) max 2960, 2940, 2860, 1490, 1400, 1180, 1000, 880 cm–1; MS *m/z* 264(M+), 262(M+), 207, 205.

2-Bromo-5-pentyltoluene (**29**)

Quantities: compound **27** (7.90 g, 0.033 mol), platinum(IV) oxide (0.15 g), ethanol (110 ml). The experimental procedure was as described for the preparation of compound **28**.

Yield 7.04 g (89%); bp 140-144 °C at 15 mmHg; 1H NMR (CDCl3)  0.90(3H, t), 1.30(4H, m), 1.55(2H, quint), 2.35(3H, s), 2.50(2H, t), 6.84(1H, dd), 7.03(1H, d), 7.39(1H, d); IR (film) max 2960, 2940, 2860, 1480, 1380, 1030, 880, 815 cm–1; MS *m/z* 242(M+), 240(M+), 185, 183.

2,5-Difluoro-4-pentylphenylboronic acid (**31**)

A solution of n-butyllithium (4.50 ml, 10.0M in hexane, 0.045 mol) was added dropwise to a stirred, cooled (–78 °C) solution of compound **28** (11.90 g, 0.045 mol) in dry THF. The solution was stirred at –78 °C for 10 minutes (GLC analysis revealed complete lithiation), and trimethyl borate (9.40 g, 0.090 mol) was added dropwise. The mixture was allowed to warm to room temperature overnight, 10% hydrochloric acid was added and the mixture was stirred for 1 h at room temperature. Water was added and the product was extracted into ether (x2), and the combined ethereal extracts were washed with water and dried (MgSO4). The solvent was removed *in vacuo* to give a colourless solid.

Yield 7.76 g (77%).

2-Methyl-4-pentylphenylboronic acid (**32**)

Quantities: compound **29** (6.65 g, 0.028 mol). The experimental procedure was as described for the preparation of compound **31**.

Yield 5.75 g (100%).

2-Fluoro-4'-nitro-4-pentylbiphenyl (**33**)

Quantities: compound **3** (2.15 g, 0.0106 mol), compound **30** (2.68 g, 0.0128 mol). The experimental procedure was as described for the preparation of compound **4**. The crude product was purified by column chromatography (silica gel / hexane - dichloromethane, 3:1) to give a pale yellow oil.

Yield 2.95 g (97%); 1H NMR (CDCl3)  0.90(3H, t), 1.35(4H, m), 1.65(2H, quint), 2.65(2H, t), 7.02(1H, ddd), 7.08(1H, dd), 7.36(1H, dd), 7.70(2H, dd), 8.28(2H, d); IR (film) max 2960, 2940, 2860, 1620, 1605, 1520, 1355, 1135, 1115, 1010, 855, 835, 760, 740, 700, 575 cm–1; MS *m/z* 287(M+), 271, 230.

2,5-Difluoro-4'-nitro-4-pentylbiphenyl (**34**)

Quantities: compound **3** (1.25 g, 6.19 mmol), compound **31** (1.55 g, 6.80 mmol). The experimental procedure was as described for the preparation of compound **4**. The crude product was purified by column chromatography (silica gel / hexane - dichloromethane, 5:1) to give a pale yellow oil.

Yield 1.80 g (96%); 1H NMR (CDCl3)  0.90(3H, t), 1.40(4H, m), 1.65(2H, quint), 2.65(2H, t), 7.02(1H, dd), 7.12(1H, dd), 7.70(2H, dd), 8.30(2H, d); IR (film) max 2960, 2940, 2860, 1605, 1525, 1490, 1400, 1350, 1175, 1120, 860, 760, 715 cm–1; MS *m/z* 305(M+), 248, 224, 210, 166.

4'-Amino-2-fluoro-4-pentylbiphenyl (**35**)

Quantities: compound **33** (2.80 g, 9.76 mmol), 5% palladium on carbon (1.50 g). The experimental procedure was as described for the preparation of compound **6**.

Yield 2.36 g (94%); mp 55-56 °C; 1H NMR (CDCl3)  0.90(3H, t), 1.30(4H, m), 1.65(2H, quint), 2.60(2H, t), 3.40(2H, s), 6.75(2H, d), 6.93(1H, ddd), 6.98(1H, dd), 7.29(1H, dd), 7.36(2H, dd); IR (KBr) max 3450, 3400, 3310, 3210, 2960, 2940, 2860, 1630, 1610, 1500, 1410, 1290, 1270, 1190, 1130, 820 cm–1; MS *m/z* 257(M+), 200.

4'-Amino-2,5-difluoro-4-pentylbiphenyl (**36**)

Quantities: compound **34** (1.75 g, 5.74 mmol), 5% palladium on carbon (1.30 g). The experimental procedure was as described for the preparation of compound **6**.

Yield 1.57 g (99%); mp 69-70 °C; 1H NMR (CDCl3)  0.90(3H, t), 1.30(4H, m), 1.65(2H, quint), 2.60(2H, t), 3.40(2H, s), 6.75(2H, d), 6.87(1H, dd), 7.12(1H, dd), 7.36(2H, dd); IR (KBr) max 3450, 3400, 3310, 3210, 2960, 2940, 2860, 1630, 1610, 1500, 1410, 1290, 1270, 1190, 1130, 820 cm–1; MS *m/z* 257(M+), 200.

2-Fluoro-4'-isothiocyanato-4-pentylbiphenyl (**37**)

Quantities: compound **35** (2.11 g, 8.21 mmol), thiophosgene (1.17 g, 0.010 mol), calcium carbonate (1.28 g, 0.013 mol). The experimental procedure was as described for the preparation of compound **8**. The crude product was purified by column chromatography (silica gel / dichloromethane) to give an off-white solid which was recrystallised from ethanol to yield colourless crystals.

Yield 1.36 g (55%); transitions (°C) C 44.5 [N 13] I; 1H NMR (CDCl3)  0.90(3H, t), 1.35(4H, m), 1.65(2H, quint), 2.65(2H, t), 6.97(1H, ddd), 7.03(1H, dd), 7.28(3H, m), 7.52(2H, dd); IR (KBr) max 2960, 2940, 2860, 2120, 1490, 1410, 1130, 1110, 1010, 935, 880, 850, 810, 740, 580 cm–1; MS *m/z* 299(M+), 242. Calc. for C18H18FNS: C, 72.21; H, 6.06; N, 4.68. Found: C, 72.18; H, 6.02; N, 4.64.

2,5-Difluoro-4'-isothiocyanato-4-pentylbiphenyl (**38**)

Quantities: compound **36** (1.47 g, 5.35 mmol), thiophosgene (0.78 g, 6.78 mmol), calcium carbonate (0.87 g, 8.70 mmol). The experimental procedure was as described for the preparation of compound **8**. The crude product was purified by column chromatography (silica gel / dichloromethane) to give a colourless solid which was recrystallised from ethanol to yield colourless crystals.

Yield 0.80 g (47%); transitions (°C) C 51.5 [N –24] I; 1H NMR (CDCl3)  0.90(3H, t), 1.35(4H, m), 1.65(2H, quint), 2.65(2H, t), 6.98(1H, dd), 7.06(1H, dd), 7.29(2H, d), 7.51(2H, dd); IR (KBr) max 2960, 2940, 2860, 2120, 1490, 1400, 1170, 935, 890, 840, 810 cm–1; MS *m/z* 317(M+), 260. Calc. for C18H17F2NS: C, 68.11; H, 5.40; N, 4.41. Found: C, 68.04; H, 5.38; N, 4.35.

2-Pent-1-ynylthiophene (**40**)

Quantities: pent-1-yne (6.80 g, 0.10 mol), n-butyllithium (10.0 ml, 10.0M in hexane, 0.10 mol), zinc chloride (13.60 g, 0.10 mol), compound **39** (16.00 g, 0.098 mol). The experimental procedure was as described for the preparation of compound **26**, except that the mixture was heated under reflux for 16 h. The crude product was distilled to yield a colourless liquid.

Yield 12.96 g (88%); bp 108-110 °C at 15 mmHg; 1H NMR (CDCl3)  1.00(3H, t), 1.60(2H, sext), 2.40(2H, t), 6.91(1H, dd), 7.10(1H, dd), 7.14(1H, dd); IR (film) max 3110, 3080, 2960, 2940, 2860, 2240, 1460, 1430, 1340, 1280, 1240, 1190, 850, 830, 700 cm–1; MS *m/z* 150(M+), 135, 121.

5-Pent-1-ynylthiophen-2-ylboronic acid (**41**)

A solution of n-butyllithium (6.80 ml, 10.0M in hexane, 0.068 mol) was added dropwise to a stirred, cooled (–78 °C) solution of compound **40** (10.00 g, 0.067 mol) in dry THF (100 ml) under dry nitrogen. The mixture was stirred at –78 °C for 30 min. and a solution of trimethyl borate (14.20 g, 0.137 mol) in dry THF (50 ml) was added dropwise. The stirred mixture was allowed to warm to room temperature overnight and 10% hydrochloric acid was added and the mixture was stirred at room temperature for 30 min. The product was extracted into ether (x2) and the combined ethereal extracts were washed with water, and dried (MgSO4). The solvent was removed *in vacuo* to give a waxy, off-white solid.

Yield 12.00 g (93%).

2-(4-Nitrophenyl)-5-pent-1-ynylthiophene (**42**)

Quantities: compound **3** (2.35 g, 0.012 mol), compound **41** (2.75 g, 0.014 mol). The experimental procedure was as described for the preparation of compound **4**. The crude product was purified by column chromatography (silica gel / hexane - dichloromethane, 5:1) to give a yellow solid which was recrystallised from ethanol to yield pale yellow crystals.

Yield 2.64 g (81%); mp 99-100 °C; 1H NMR (CDCl3)  1.05(3H, t), 1.65(2H, sext), 2.45(2H, t), 7.12(1H, d), 7.30(1H, d), 7.67(2H, d), 8.22(2H, d); IR (KBr) max 2960, 2940, 1595, 1505, 1345, 1260, 1115, 855, 805, 750 cm–1; MS *m/z* 271(M+), 256, 242.

2-(4-Aminophenyl)-5-pentylthiophene (**43**)

Quantities: compound **42** (2.42 g, 8.93 mmol), 5% palladium on carbon (2.00 g). The experimental procedure was as described for the preparation of compound **6** to yield a pale yellow solid.

Yield 2.13 g (97%); mp 50-52 °C; 1H NMR (CDCl3)  0.90(3H, t), 1.35(4H, m), 1.65(2H, t), 3.40(2H, s), 6.65(2H, d), 6.68(1H, d), 6.95(1H, d), 7.35(2H, d), IR (film) max 3440, 3400, 3320, 3210, 2960, 2940, 2860, 1620, 1520, 1470, 1280, 1185, 1140, 955, 820, 795, 500
cm–1; MS *m/z* 245(M+), 188.

2-(4-Isothiocyanatophenyl)-5-pentylthiophene (**44**)

Quantities: compound **43** (1.98 g, 8.08 mmol), thiophosgene (1.16 g, 0.010 mol), calcium carbonate (1.26 g, 0.0126 mol). The experimental procedure was as described for the preparation of compound **8**. The crude product was purified by column chromatography (silica gel / dichloromethane) to give an off-white solid which was recrystallised from ethanol to yield colourless crystals.

Yield 1.63 g (70%); transitions (°C) C 72.5 [N 26] I; 1H NMR (CDCl3)  0.90(3H, t), 1.40(4H, m), 1.70(2H, quint), 2.80(2H, t), 6.75(1H, d), 7.15(1H, d), 7.19(2H, d), 7.55(2H, d); IR (KBr) max 2960, 2940, 2860, 2040, 1505, 945, 835, 800 cm–1; MS *m/z* 287(M+), 230. Calc. for C16H17NS2: C, 66.85; H, 5.96; N, 4.87. Found: C, 66.83; H, 5.95; N, 4.85.

2-Cyano-6-(2-fluoro-4-pentylphenylnaphthalene (**47**)

Quantities: compound **45** (1.26 g, 4.19 mmol), compound **30** (1.06 g, 5.05 mmol). The experimental procedure was as described for the preparation of compound **4**, except that lithium chloride (0.55 g, 0.013 mol) was added with the reagents. The crude product was purified by column chromatography (silica gel / hexane - dichloromethane, 2:1) to give a colourless solid which was recrystallised from ethanol to yield colourless crystals.

Yield 1.08 g (81%); transitions (°C) C 71.5 N 95.5 I; 1H NMR (CDCl3)  0.90(3H, t), 1.35(4H, m), 1.65(2H, quint), 2.65(2H, t), 7.04(1H, ddd), 7.09(1H, dd), 7.45(1H, dd), 7.62(1H, dd), 7.81(1H, ddd), 7.94(2H, d), 8.04(1H, d), 8.24(1H, d); IR (KBr) max 2960, 2940, 2860, 2240, 1630, 1430, 1275, 1125, 895, 820 cm–1; MS *m/z* 317(M+), 273, 260. Calc. for C22H20FN: C, 83.25; H, 6.35; N, 4.41. Found: C, 83.25; H, 6.30; N, 4.40.

2-Cyano-6-(2,5-difluoro-4-pentylphenyl)naphthalene (**48**)

Quantities: compound **45** (1.35 g, 4.49 mmol), compound **31** (1.18 g, 5.18 mmol). The experimental procedure was as described for the preparation of compound **4**, except that lithium chloride (0.60 g, 0.014 mol) was added with the reagents. The crude product was purified by column chromatography (silica gel / hexane - dichloromethane, 2:1) to give a colourless solid which was recrystallised from ethanol to give colourless crystals.

Yield 1.20 g (80%); transitions (°C) C 94.5 [N 44] I; 1H NMR (CDCl3)  0.90(3H, t), 1.35(4H, m), 1.65(2H, quint), 2.65(2H, t), 7.04(1H, dd), 7.20(1H, dd), 7.62(1H, dd), 7.78(1H, ddd), 7.96(2H, d), 8.04(1H, d), 8.25(1H, d); IR (KBr) max 2960, 2940, 2240, 1510, 1500, 1480, 1420, 1170, 910, 885, 825 cm–1; MS *m/z* 335(M+), 278. Calc. for C22H19F2N: C, 78.78; H, 5.71; N, 4.18. Found: C, 78.75; H, 5.70; N, 4.13.

2-Cyano-6-(2,3-difluoro-4-pentylphenyl)naphthalene (**49**)

Quantities: compound **45** (1.80 g, 5.98 mmol), compound **46** (1.75 g, 7.68 mmol). The experimental procedure was as described for the preparation of compound **4**, except that lithium chloride (0.80 g, 0.019 mol) was added with the reagents. The crude product was purified by column chromatography (silica gel / hexane - dichloromethane, 2:1) to give a colourless solid which was recrystallised from ethanol to give colourless crystals.

Yield 1.37 g (68%); transitions (°C) C 84.0 (N 79.5) I; 1H NMR (CDCl3)  0.90(3H, t), 1.40 (4H, m), 1.70(2H, quint), 2.70(2H, t), 7.06(1H, ddd), 7.22(1H, ddd), 7.97(2H, m), 8.05(1H, d), 8.26(1H, d); IR (KBr) max 2960, 2940, 2240, 1460, 1275, 1090, 900, 875, 825, 805 cm–1; MS *m/z* 335(M+), 278. Calc. for C22H19F2N: C, 78.78; H, 5.71; N, 4.18. Found: C, 78.73; H, 5.68; N, 4.16.

2-Cyano-6-(2-methyl-4-pentylphenyl)naphthalene (**50**)

Quantities: compound **45** (1.80 g, 5.98 mmol), compound **32** (1.48 g, 7.18 mmol). The experimental procedure was as described for the preparation of compound **4**, except that lithium chloride (0.80 g, 0.019 mol) was added with the reagents. The crude product was purified by column chromatography (silica gel / hexane - dichloromethane, 2:1) to give a colourless solid which was recrystallised from ethanol to yield colourless crystals.

Yield 1.53 g (82%); transitions (°C) C 78.0 [N 27] I; 1H NMR (CDCl3)  0.90(3H, t), 1.35(4H, m), 1.65(2H, quint), 2.65(2H, t), 7.11(1H, dd), 7.13(1H, d), 7.22(1H, d), 7.60(1H, dd), 7.64(1H, dd), 7.81(1H, d), 7.92(2H, 2xd), 8.26(1H, d); IR (KBr) max 2960, 2940, 2860, 2230, 1630, 1475, 915, 900, 825, 480 cm–1; MS *m/z* 313(M+), 256, 140. Calc. for C23H23N: C, 88.13; H, 7.40; N, 4.47. Found: C, 88.10; H, 7.36; N, 4.45.

2-(4-Butoxy-2-fluorophenyl)-6-cyanonaphthalene (**52**)

Quantities: compound **45** (2.30 g, 7.4 mmol), compound **51** (1.95 g, 9.20 mmol). The experimental procedure was as described for the preparation of compound **4**, except that lithium chloride (1.00 g, 0.024 mol) was added with the reagents. The crude product was purified by column chromatography (silica gel / hexane - dichloromethane, 1:1) to give a colourless solid which was recrystallised from ethanol to yield colourless crystals.

Yield 1.90 g (78%); transitions (°C) C 64.5 N 129.5 I; 1H NMR (CDCl3)  1.00(3H, t), 1.50(2H, quint), 1.85(2H, quint), 4.00(2H, t), 6.76(1H, ddd), 6.82(1H, dd), 7.45(1H,dd), 7.61(1H, dd), 7.78(1H, ddd), 7.93(2H, d), 8.00(1H, d), 8.24(1H, d); IR (KCl) max 2960, 2940, 2860, 2240, 1630, 1520, 1495, 1475, 1315, 1290, 1165, 1130, 1040, 900, 840 cm–1; MS *m/z* 319(M+), 262. Calc. for C21H18FNO: C, 78.98; H, 5.68; N, 4.39. Found: C, 78.96; H, 5.68; N, 4.35.

2-(6-Cyanonaphth-2-yl)-5-pent-1-ynylthiophene (**53**)

Quantities: compound **45** (2.00 g, 6.64 mmol), compound **41** (1.55 g, 7.99 mmol). The experimental procedure was as described for the preparation of compound **4**, except that lithium chloride (0.85 g, 0.020 mol) was added with the reagents. The crude product was purified by column chromatography (silica gel / hexane - dichloromethane, 2:1) to give a pale yellow solid which was recrystallised from ethanol to yield very pale yellow crystals.

Yield 1.55 g (78%); transitions (°C) C 104.0 (N 87.0) I; 1H NMR (CDCl3)  1.00(3H, t), 1.60(2H, sext), 2.45(2H, t), 7.11(1H, d), 7.31(1H, d), 7.58(1H, dd), 7.77(1H, dd), 7.85(1H, d), 7.88(1H, d), 7.96(1H, d), 8.14(1H, d); IR (KB) max 2990, 2960, 2880, 2220, 1620, 1600, 1495, 1445, 1165, 890, 800 cm–1; MS *m/z* 301(M+), 286, 272. C20H15NS: C, 79.70; H, 5.02; N, 4.65. Found: C, 79.66; H, 4.98; N, 4.62.

2-(6-Cyanonaphth-2-yl)-5-pentylthiophene (**54**)

Quantities: compound **53** (0.70 g, 2.32 mmol), 10% palladium on carbon (0.30 g). The experimental procedure was as described for the preparation of compound **6**, except that hydrogenation time was 6 h. The crude product was purified by column chromatography (silica gel / hexane - dichloromethane, 2:1) to give a colourless solid which was recrystallised from ethanol to yield colourless crystals.

Yield 0.50 g (71%); transitions (°C) C 72.5 N 92.0 I; 1H NMR (CDCl3)  0.90(3H, t), 1.37(4H, m), 1.70(2H, quint), 2.83(2H, t), 6.80(1H, d), 7.30(1H, d), 7.56(1H, dd), 7.80(1H, dd), 7.82(1H, d), 7.84(1H, d), 7.97(1H, d), 8.15(1H, d); IR (KBr) max 2990, 2960, 2880, 2220, 1620, 1600, 1495, 1445, 1165, 890, 800 cm–1; MS *m/z* 305(M+), 248. C20H19NS: C, 78.65; H, 6.27; N, 4.59. Found: C, 78.65; H, 6.26; N,4.57.

4'-Cyanobiphenyl-4-yl triflate (**56**)

A solution of *N*-phenyltriflamide (7.10 g, 0.02 mol) in dry dichloromethane (40 ml) was added dropwise to a stirred, cooled (–78 °C) solution of compound **55** (3.60 g, 0.018 mol) in dry dichloromethane (70 ml) and dry triethylamine (3.65 g, 0.036 mol) under dry nitrogen. The stirred mixture was allowed to warm to room temperature overnight (GLC and TLC analysis revealed a complete reaction). The mixture was washed with aqueous sodium carbonate and the separated aqueous layer was washed with dichloromethane. The combined organic extracts were washed with water and dried (MgSO4). The solvent was removed in vacuo and the residue was purified by column chromatography (silica gel / dichloromethane) to give a colourless solid.

Yield 5.41 g (92%); mp 73-74 °C; 1H NMR (CDCl3)  7.40(2H, d), 7.64(2H, d), 7.67(2H, d), 7.76(2H, d); IR (KBr) max 2230, 1610, 1490, 1425, 1250, 1215, 1140, 890, 830 cm–1; MS *m/z* 327(M+), 302, 263.

2-methyl-4-pentyl-4''-cyano-1,1':4',1''-terphenyl (**57**)

Quantities: compound **56** (1.93 g, 5.90 mmol), compound **32** (1.46 g, 7.09 mmol). The experimental procedure was as described for the preparation of compound **4**, except that lithium chloride (0.75 g, 0.018 mol) was added with the reagents. The crude product was purified by column chromatography (silica gel / hexane - dichloromethane, 2:1) to give a colourless solid which was recrystallised from ethanol to yield colourless crystals.

Yield 1.10 g (55%); transitions (°C) C 58.5 N 113.0 I; 1H NMR (CDCl3)  0.90(3H, t), 1.37(4H, m), 1.68(2H, quint), 2.31(3H, s), 2.63(2H, t), 7.10(1H, dd), 7.13(1H, d), 7.19(1H, d), 7.45(2H, d), 7.64(2H, d), 7.75(4H, 2xd); IR (KBr) max 2990, 2960, 2880, 2225, 1605, 1490, 1110, 1010, 825 cm–1; MS *m/z* 339(M+), 282.

4'-Cyano-2,5-difluoro-4-pentylbiphenyl (**59**)

Quantities: compound **58** (0.96 g, 5.27 mmol), compound **31** (1.38 g, 6.05 mmol). The experimental procedure was as described for the preparation of compound **4**. The crude product was purified by column chromatography (silica gel / hexane - dichloromethane, 2:1) to give a colourless solid which was recrystallised from ethanol to yield colourless crystals.

Yield 0.95 g (63%); transitions (°C) C 54.5 [N –11] I; 1H NMR (CDCl3)  0.90(3H, t), 1.35(4H, m), 1.65(2H, quint), 2.65(2H, t), 7.01(1H, dd), 7.09(1H, dd), 7.63(2H, dd), 7.73(2H, d); IR (KBr) max 2960, 2940, 2860, 2240, 1615, 1495, 1400, 1175, 900, 840, 820, 750, 560 cm–1; MS *m/z* 285(M+), 228.

2-(4-Cyanophenyl)-5-pentylthiophene (**61**)

Quantities: compound **58** (1.45 g, 7.97 mmol), compound **41** (1.85 g, 9.54 mmol). The experimental procedure was as described for the preparation of compound **4**. The crude product was purified by column chromatography (silica gel / hexane - dichloromethane, 2:1) and hydrogenated in THF (80 ml) and ethanol (20 ml) in the presence of 5% palladium-on-charcoal (0.30 g) catalyst at room temperature and atmospheric pressure. The catalyst was filtered off and the solvent was removed *in vacuo* and the residue was purified by column chromatography (silica gel / hexane - dichloromethane, 2:1) to give a colourless oil which was distilled [Kugelrohr, 150 °C (maximum) at 0.5 mmHg] to yield a colourless solid which was recrystallised from ethanol to yield colourless crystals.

Yield 1.45 g (71%); transitions (°C) C 39.5 (N 16.0) I; 1H NMR (CDCl3)  0.90(3H, t), 1.35(4H, m), 1.65(2H, quint), 2.80(2H, t), 6.79(1H, d), 7.24(1H, d), 7.61(4H, 2xd); IR (KBr) max 2960, 2940, 2860, 2240, 1605, 1510, 1470, 1410, 1270, 1215, 1180, 1125, 950, 840, 805, 740, 555, 520 cm–1; MS *m/z* 255(M+), 198.

2-Butoxy-6-(4-fluorophenyl)naphthalene (**65**)

Quantities: compound **62** (1.35 g, 7.71 mmol), compound **1** (2.45 g, 0.01 mol). The experimental procedure was as described for the preparation of compound **4**. The crude product was purified by column chromatography (silica gel / hexane - dichloromethane, 3:1) to give a colourless solid which was recrystallised from ethanol-ethyl acetate (2:1) to yield colourless crystals.

Yield 1.80 g (79%); transitions (°C) C 128.5 [N 112] I; 1H NMR (CDCl3)  1.00(3H, t), 1.55(2H, sext), 1.85(2H, quint), 4.10(2H, t), 7.11-7.20(4H, m), 7.61-7.67(3H, m), 7.77(2H, m), 7.90(1H, d); IR (KCl) max 2960, 2940, 2860, 1630, 1610, 1520, 1505, 1470, 1390, 1250, 1205, 1175, 840, 810 cm–1; MS *m/z* 294(M+), 238. Calc. for C20H19FO: C, 81.60; H, 6.51. Found: C, 81.56; H, 6.48.

2-Butoxy-6-(3,4-difluorophenyl)naphthalene (**66**)

Quantities: compound **63** (1.30 g, 6.74 mmol), compound **1** (2.14 g, 8.77 mmol). The experimental procedure was as described for the preparation of compound **4**. The crude product was purified by column chromatography (silica gel / hexane - dichloromethane, 6:1) to give a colourless solid which was recrystallised from ethanol to yield colourless crystals.

Yield 1.46 g (69%); transitions (°C) C 81.5 [N 42] I; 1H NMR (CDCl3)  1.00(3H, t), 1.55(2H, sext), 1.85(2H, quint), 4.10(2H, t), 7.13-7.23(3H, m), 7.40(1H, m), 7.49(1H, m), 7.60(1H, dd), 7.78(2H, 2xd), 7.89(1H, d); IR (KCl) max 2960, 2940, 2860, 1630, 1600, 1530, 1500, 1390, 1310 1275, 1215, 1175, 1215, 1175, 1120, 875, 860, 830, 805, 780 cm–1; MS *m/z* 312(M+), 256. Calc. for C20H18F2O: C, 76.90; H, 5.81. Found: C, 76.88; H, 5.78.

2-Butoxy-6-(2,4-difluorophenyl)naphthalene (**67**)

Quantities: compound **64** (1.37 g, 7.10 mmol), compound **1** (2.27 g, 9.30 mmol). The experimental procedure was as described for the preparation of compound **4**. The crude product was purified by column chromatography (silica gel / hexane - dichloromethane, 3:1) to give a colourless solid which was recrystallised from ethanol to yield colourless crystals.

Yield 1.40 g (63%); transitions (°C) C 72.0 (N 63.0) I; 1H NMR (CDCl3)  1.00(3H, t), 1.55(2Hm sext), 1.85(2H, quint), 4.10(2H, t), 6.90-7.00(2H, m), 7.15(1H, d), 7.18(1H,dd), 7.49(1H, m), 7.57(1H, ddd), 7.77(2H, 2xd), 7.87(1H, d); IR (KCl) max 2960, 2940, 2860, 1620, 1610, 1595, 1510, 1500, 1390, 1260, 1205, 1175, 1145, 1100, 1070, 900, 855, 805 cm–1; MS *m/z* 312(M+), 256. Calc. for C20H18F2O: C, 76.90; H, 5.81. Found: C, 76.90; H, 5.80.

2-Butoxy-6-[4-(trifluoromethyl)phenyl]naphthalene (**70**)

Quantities: compound **68** (1.46 g, 6.49 mmol), compound **1** (2.10 g, 8.60 mmol). The experimental procedure was as described for the preparation of compound **4**. The crude product was purified by column chromatography (silica gel / hexane - dichloromethane, 5:1) to give a colourless solid which was recrystallised from ethanol-ethyl acetate (2:1) to yield colourless crystals.

Yield 1.72 g (77%); transitions (°C) C 177.5 [N 95] I; 1H NMR (CDCl3)  1.00(3H, t), 1.55(2H, sext), 1.85(2H, quint), 4.10(2H, t), 7.16(1H, d), 7.19(1H, dd), 7.67(1H, dd), 7.71(2H, d), 7.79(2H, d), 7.81(2H, d), 7.97(1H, d); IR (KCl) max 2960, 2940, 2860, 1620, 1605, 1395, 1335, 1280, 1255, 1210 1130, 1115, 1075, 1015, 845, 820, 805 cm–1; MS *m/z* 344(M+), 288, 259. Calc. for C21H19F3O: C, 73.24; H, 5.56. Found: C, 73.20; H, 5.53.

2-Butoxy-6-[2-fluoro-4-(trifluoromethyl)phenyl]naphthalene (**71**)

Quantities: compound **69** (1.48 g, 6.09 mmol), compound **1** (1.93 g, 7.91 mmol). The experimental procedure was as described for the preparation of compound **4**. The crude product was purified by column chromatography (silica gel / hexane - dichloromethane, 6:1) to give a colourless solid which was recrystallised from ethanol to yield colourless crystals.

Yield 1.51 g (68%); transitions (°C) C 73.5 SA 105.5 [N 55] I; 1H NMR (CDCl3)  1.00(3H, t), 1.55(2H, sext), 1.85(2H, quint), 4.10(2H, t), 7.16(1H, d), 7.20(1H, dd), 7.45(1H, dd), 7.51(1H, dd), 7.61(1H, ddd), 7.66(1H, dd), 7.79(1H, d), 7.81(1H, d), 7.97(1H, d); IR (KCl) max 2960, 2940, 2860, 1620, 1605, 1430, 1340, 1240, 1195, 1160, 1130, 1120, 1070, 940, 885, 865, 835 cm–1; MS *m/z* 362(M+), 306. Calc. for C21H18F4O: C, 69.41; H, 5.27. Found: C, 69.40; H, 5.25.

**References**

1 M. Hird, K. J. Toyne, G. W. Gray, S. E. Day and D. G. McDonnell, *Liquid Crystals*, 1993, **15**, 123.

2 G. W. Gray, M. Hird and K. J. Toyne, *Mol. Cryst. Liq. Cryst.*, 1991, **195**, 221.

3 G. W. Gray, M. Hird and K. J. Toyne, *Mol. Cryst. Liq. Cryst.*, 1991, **204**, 43.

4 G. W. Gray, M. Hird, D. Lacey and K. J. Toyne, *J. Chem. Soc., Perkin Trans. 2*, 1989, 2041.

5 D. R. Coulson, *Inorg. Synth.*, 1972, **13**, 121.
